# Supplementary material
Source: PubMed Central journal article supplement (PMC4303334)
Supplement: la5036689_si_001.pdf [file la5036689_si_001.pdf]

## Supporting Information

# Caging metal ions with light-responsive nano- polymersomes

*Julianne C. Griepenburg,<sup>‡a</sup> Nihil Sood,<sup>‡b</sup> Kevin B. Vargo,<sup>b</sup> Dewight Williams,<sup>c</sup> Jeff Rawson,<sup>d</sup>  
Michael J. Therien,<sup>d</sup> Daniel A. Hammer,<sup>b,e</sup> Ivan J. Dmochowski<sup>\*a</sup>*

<sup>a</sup>Department of Chemistry, University of Pennsylvania, 231 South 34th Street, Philadelphia, PA 19104

<sup>b</sup>Department of Chemical and Biomolecular Engineering, University of Pennsylvania, 220 South 33rd Street, Philadelphia, PA 19104

<sup>c</sup>Department of Biochemistry and Biophysics, Perelman School of Medicine, University of Pennsylvania, 3700 Hamilton Walk, Philadelphia, PA 19104

<sup>d</sup>Department of Chemistry, Duke University, 124 Science Drive, Durham, NC 27708

<sup>e</sup>Department of Bioengineering, University of Pennsylvania, 210 South 33rd Street, 240 Skirkanich Hall, Philadelphia, PA 19104

## Table of Contents

|                                                                                                                                  |     |
|----------------------------------------------------------------------------------------------------------------------------------|-----|
| Figure S1: Dynamic light scattering (DLS) of nano-polymersomes self-assembled with different concentrations of OB29 in DMSO..... | S3  |
| Figure S2: DLS of nano-polymersomes self-assembled with different percentages of DMSO in buffer.....                             | S4  |
| Figure S3: Cryo-TEM of nano-polymersomes self-assembled with different percentages of DMSO in buffer .....                       | S5  |
| Figure S4: DLS of nano-polymersomes with varying vortex time for self-assembly .....                                             | S6  |
| Figure S5: Cryo-TEM of nano-polymersomes with varying vortex time for self-assembly .....                                        | S7  |
| Figure S6: Reproducibility of nano-polymersome size .....                                                                        | S8  |
| Figure S7: Structure of meso-to-meso ethyne-bridged (porphinato)zinc(II) dimer (PZn <sub>2</sub> ) .....                         | S9  |
| Equation S1: Equation used to calculate fractional release .....                                                                 | S9  |
| Figure S8: FITC release from nano-polymersomes without PZn <sub>2</sub> or dextran .....                                         | S10 |
| Methods S1: Cryo-TEM .....                                                                                                       | S11 |
| Figure S9: Nano-polymersome distribution <i>in vivo</i> .....                                                                    | S12 |
| Figure S10: Hydrodynamic diameter of metal ion-loaded nano-polymersomes determined by DLS .....                                  | S13 |
| Equation S2: Ion release approximation .....                                                                                     | S14 |
| Reference .....                                                                                                                  | S15 |

**Figure S1: Dynamic light scattering (DLS) of nano-polymersomes self-assembled with different concentrations of OB29 in DMSO**

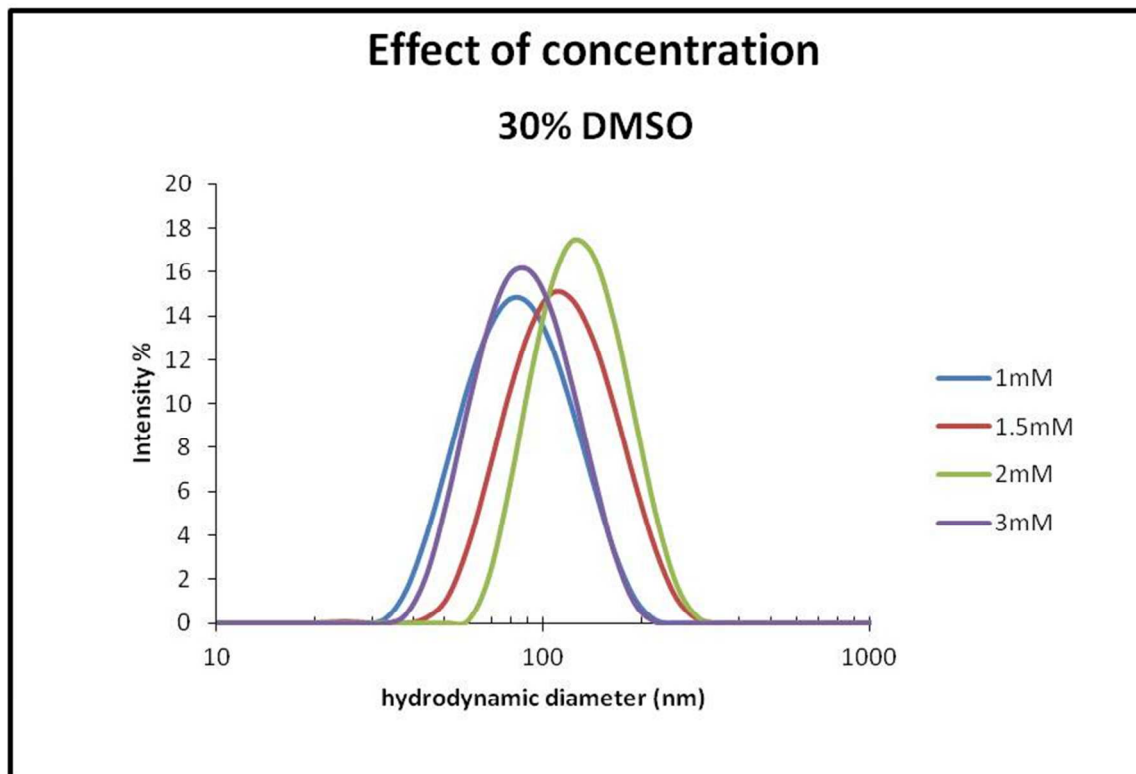

DLS measurements showing differences in vesicle size with varying OB29 concentration in 30% DMSO/70% PBS.

**Figure S2: DLS of nano-polymersomes self-assembled with different percentages of DMSO in buffer**

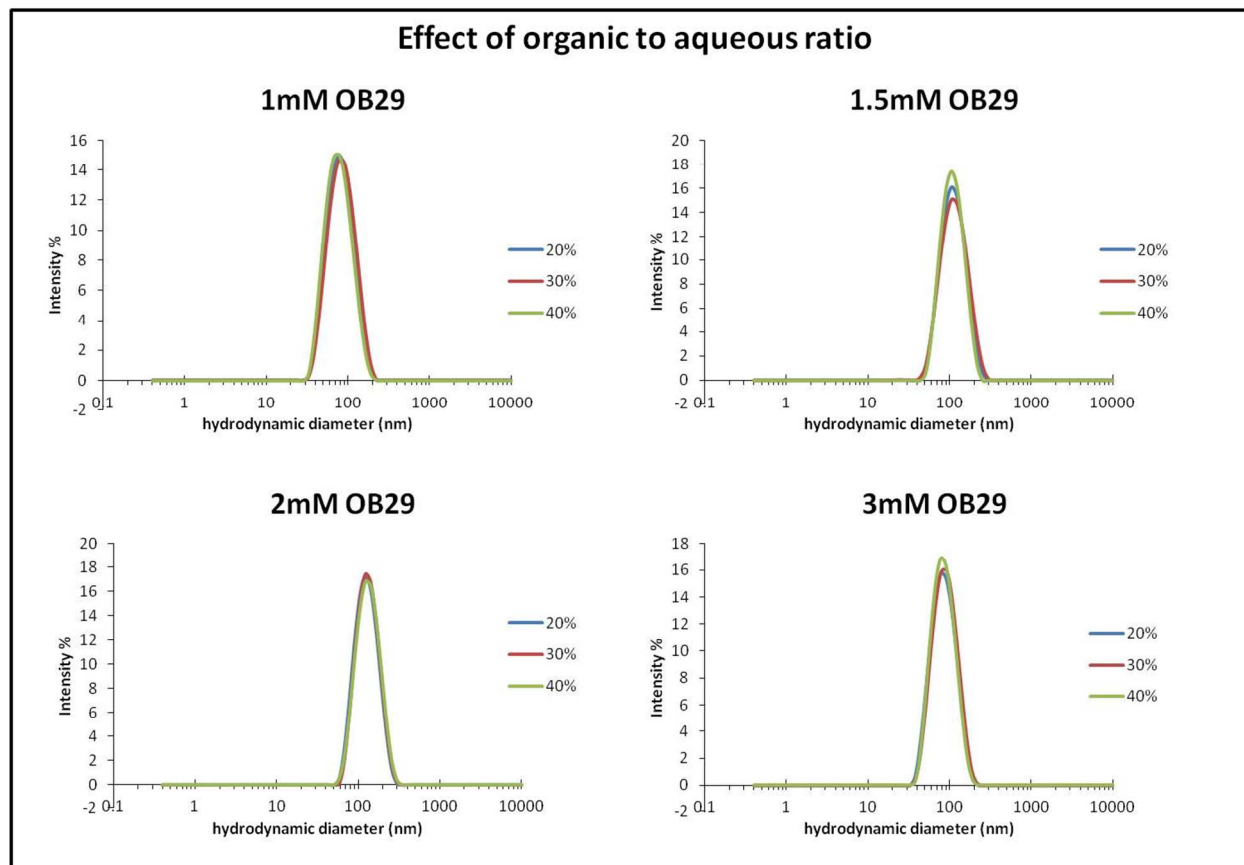

DLS measurements showing no significant effect on organic (OB29 in DMSO) to aqueous (0.1 M PBS) ratio. Percentage represents percent DMSO in final solution.

**Figure S3: Cryo-TEM of nano-polymerosomes self-assembled with different percentages of DMSO in buffer**

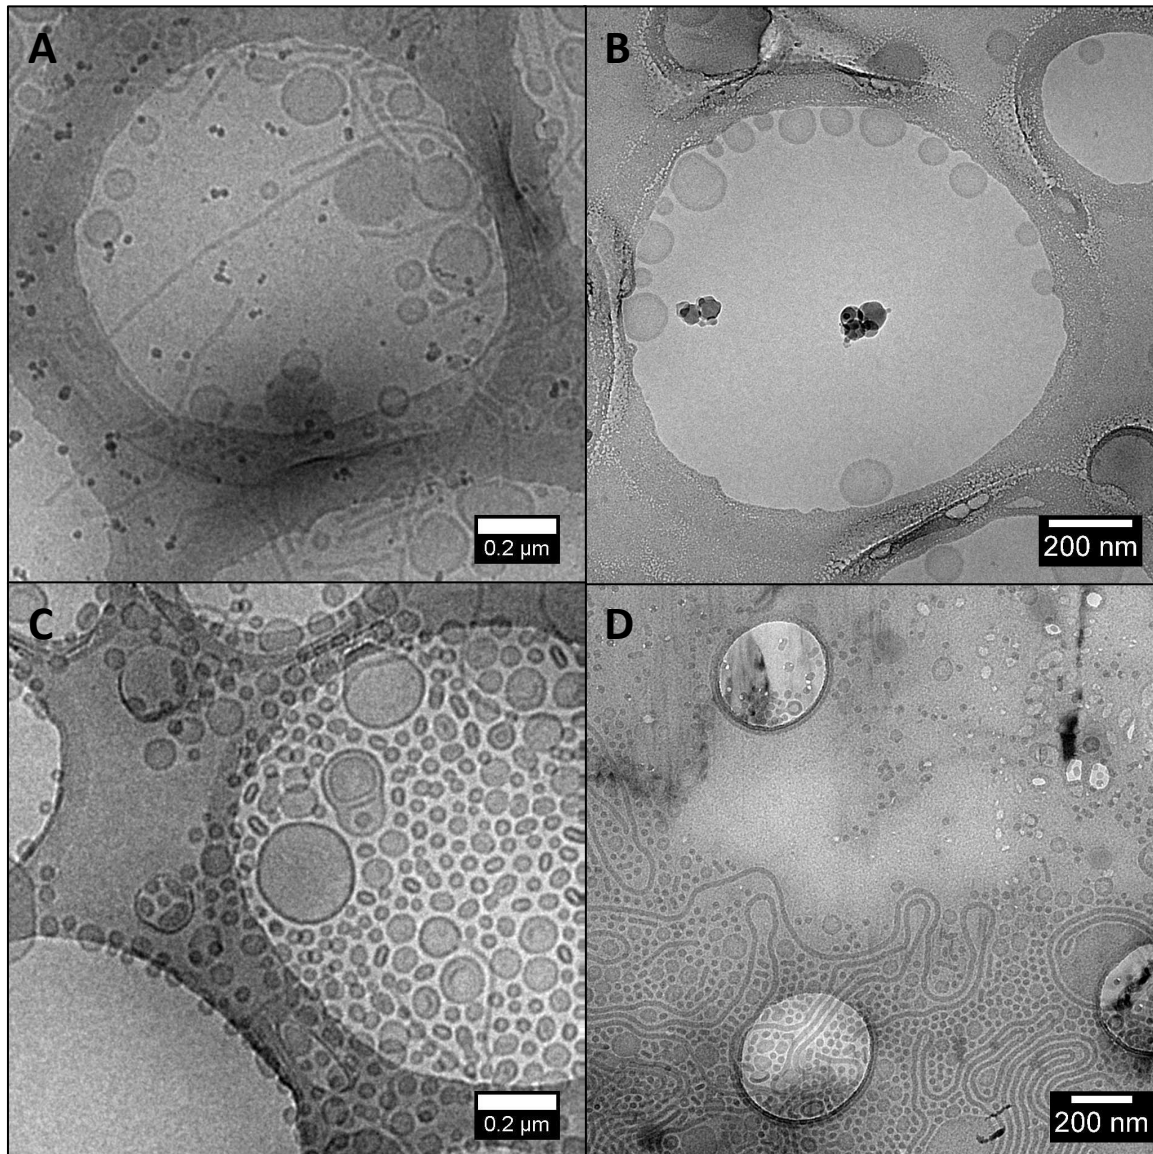

Cryo-TEM images showing the effect of organic-to-aqueous ratio on vesicle morphology. A) 10% DMSO resulted in vesicles and worm-like structures. B, C) 30% and 50% DMSO resulted in uniform, unilamellar vesicles. D) 70% DMSO resulted in vesicles and worm-like structures.

**Figure S4: DLS of nano-polymerosomes with varying vortex time for self-assembly**

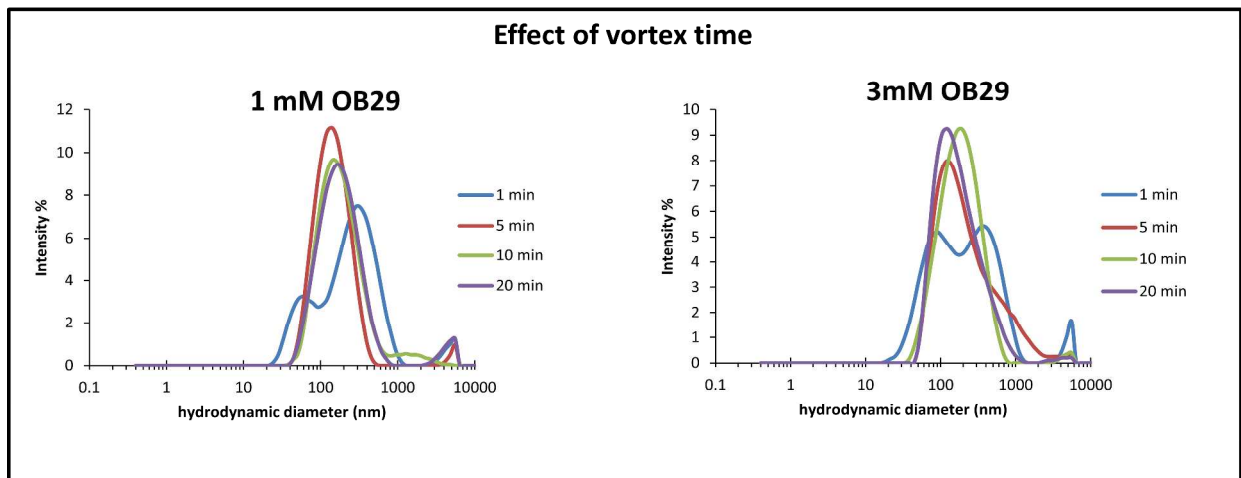

DLS showing the effect of vortex time on vesicle size. Vesicles were prepared by directly injecting OB29 in 30% DMSO into 0.1 M PBS followed by immediate vortexing. Vesicle size converged by 5 min for both 1 mM and 3 mM OB29 concentrations.

**Figure S5: Cryo-TEM of nano-polymerosomes with varying vortex time for self-assembly**

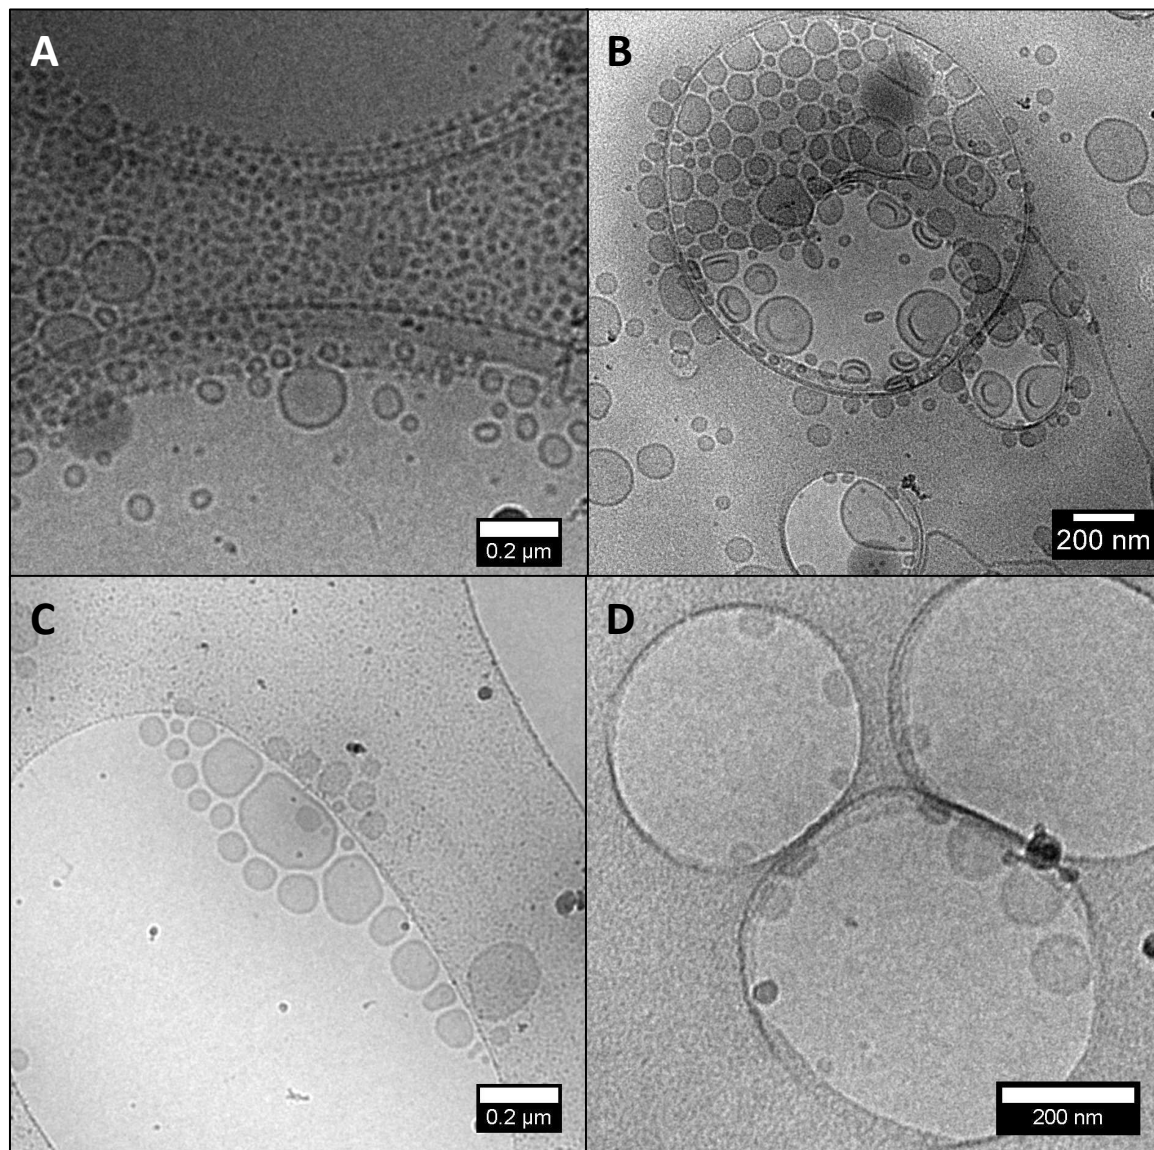

Cryo-TEM images showing the effect of vortex time on vesicle morphology. Vesicles were prepared by directly injecting OB29 in 30% DMSO into 0.1 M PBS followed by immediate vortexing. A) 1-min vortexing resulted in a large number of micelles. B) 5-min vortexing resulted in uniform, unilamellar vesicles. C, D) 10-min and 20-min vortexing showed no significant change from 5 min.

**Figure S6: Reproducibility of nano-polymerosome size**

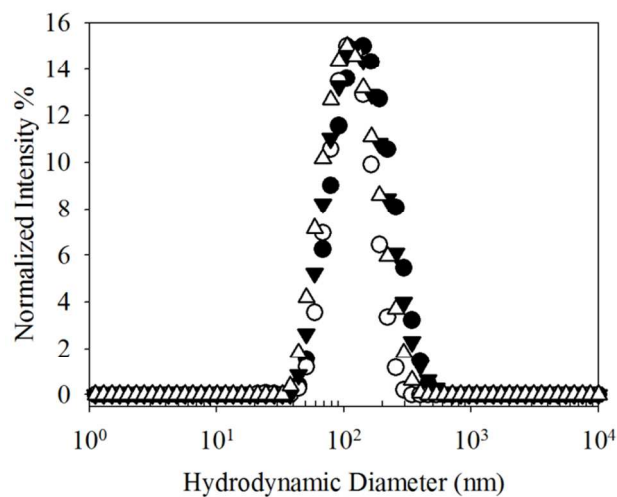

Dynamic light scattering (DLS) measurements for four independent nano-polymerosome samples. Vesicles were prepared by directly injecting OB29 in 30% DMSO into 0.1 M PBS followed by immediate vortexing (final OB29 concentration of 1.5 mM). The average hydrodynamic radius was determined to be  $120 \pm 20$  nm.



**Figure S7: Structure of meso-to-meso ethyne-bridged (porphinato)zinc(II) dimer (PZn<sub>2</sub>)**

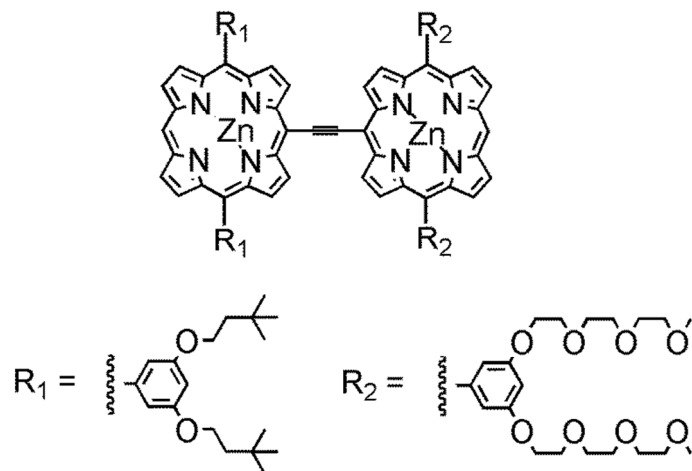

**Equation S1: Equation used to calculate fractional release**

$$\% \text{ Release} = \frac{Em_{\text{irradiated}} - Em_{\text{background}}}{Em_{\text{triton}} - Em_{\text{background}}} \times 100\%$$

**Figure S8: FITC release from nano-polymersomes without PZn<sub>2</sub> or dextran**

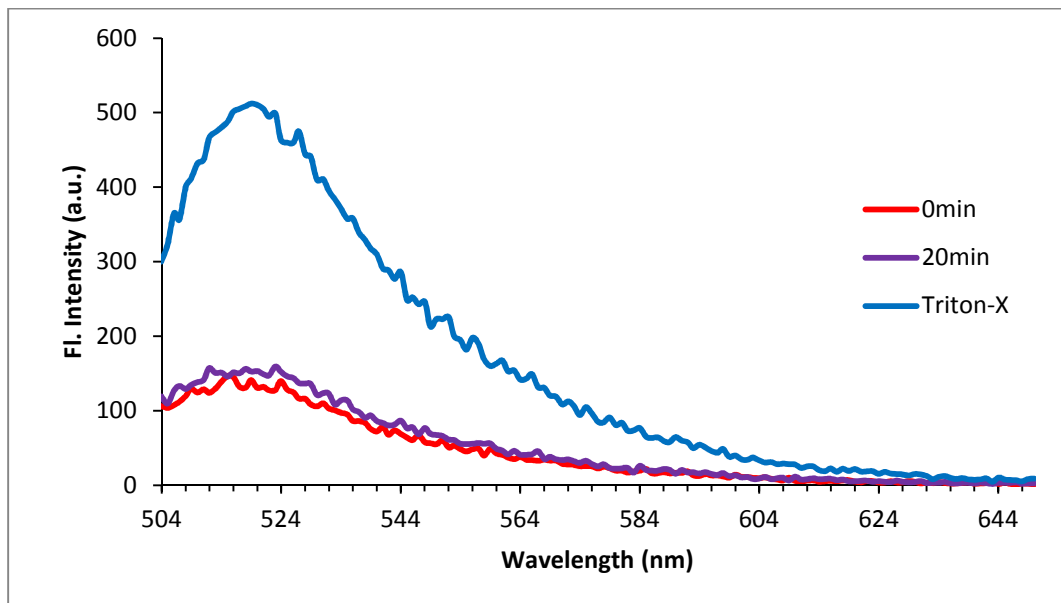

Nano-polymersomes were made with no PZn<sub>2</sub> in the membrane and without dextran in the aqueous core. These vesicles were subjected to 20-min irradiation (488, 515, 543, 633 nm lasers), and fluorescence intensity was compared to a positive control sample (Triton-X added to 0.1 vol%). Release from these vesicles was negligible.

## Methods S1: Cryo-TEM

Krishna P. Singh Center for Nanotechnology: Lacey formvar/carbon grids (Ted Pella) were cleaned with chloroform to remove the formvar coating, carbon coated with a Quorum Q150 ES carbon coater (Quorum Technologies, UK), and cleaned with hydrogen/oxygen plasma for 15 seconds using a Solarus Advanced Plasma System 950 (Gatan, Pleasanton, CA). The polymersome sample (2  $\mu$ L) was deposited onto the grid and inserted into a cryoplunger (Cp3, Gatan). The sample was blotted by hand with filter paper and plunged into liquid ethane. The samples were subsequently transferred to a Gatan CT3500TR cryoholder and inserted quickly into a JEOL 2100 HRTEM (JEOL, Tokyo, Japan) operating at 200 keV. Images were captured using an Orius SC200 digital camera.

Electron Microscopy Resource Laboratory: Lacey carbon grids were glow discharged for 20 seconds at 25 mA to create a hydrophilic surface. Polymersome sample (3  $\mu$ L) was applied and a thin film was formed by blotting the grid with filter paper. Vitreous ice was formed by rapid plunging into liquid ethane cooled to -180 °C by liquid nitrogen. Frozen hydrated samples were observed at -178 °C in a FEI (Hillsboro, OR.) Tecnai-12 microscope operated at 120 keV at magnifications between 6,500 and 15,000. Images were recorded on a Gatan (Warrendale, PA) US 1000 2048<sup>2</sup> CCD camera. All vesicle measurements were performed in Digital Micrograph.

**Figure S9: Nano-polymersome distribution *in vivo***

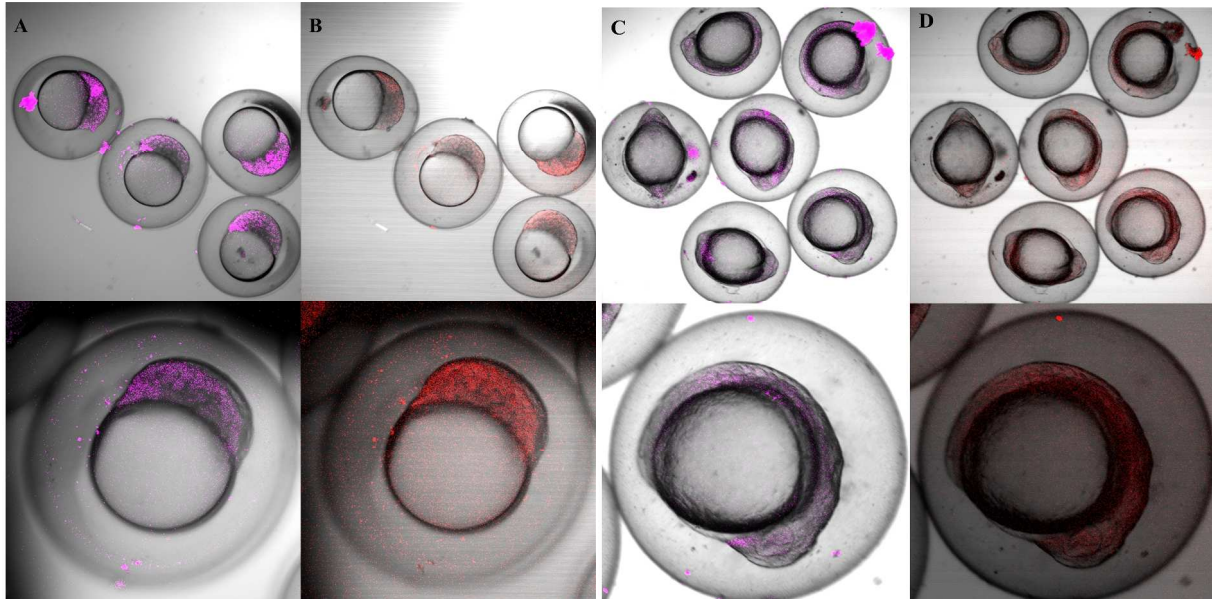

Nano-vesicles were microinjected into zebrafish embryos at the 1-cell stage and monitored for A) PZN<sub>2</sub> emission and B) Texas Red emission. Embryos were imaged again at 20 hpf and monitored for C) PZN<sub>2</sub> emission and D) Texas Red emission. Collections of multiple embryos (top) were imaged with 4x objective. Single embryos (bottom) were imaged with 10x objective.

**Figure S10: Hydrodynamic diameter of metal ion-loaded nano-polymsomes determined by DLS**

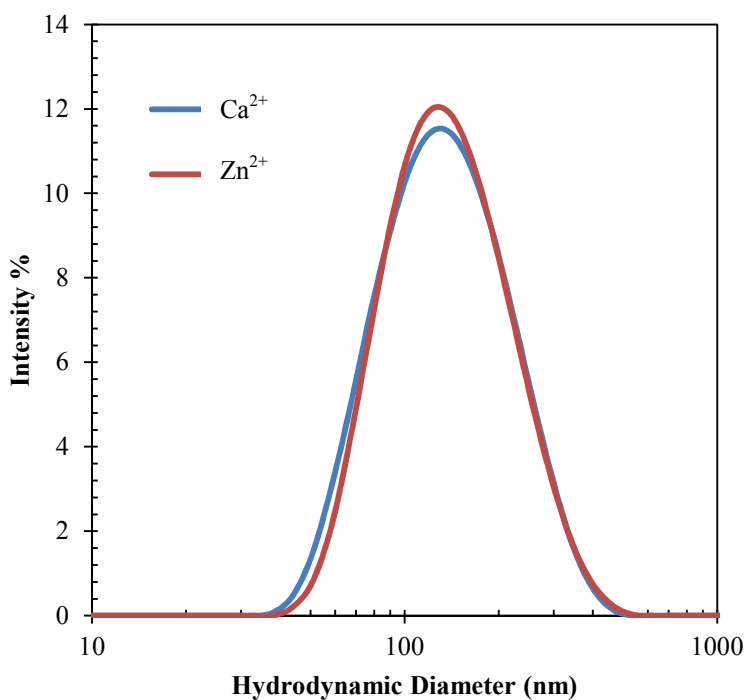

The average hydrodynamic diameter of vesicles containing Ca<sup>2+</sup> was determined to be 120 nm (blue). The average hydrodynamic diameter of vesicles containing Zn<sup>2+</sup> was also determined to be 120 nm (red).

### Equation S2: Ion release approximation

The number of vesicles can be approximated as follows:

$$\# \text{ of vesicles}(n) = \frac{(\text{total polymer})(\text{vesicle surface area})}{\text{polymer chain density}}$$

The chain density is approximated to be 1 chain/nm<sup>2</sup>, which has previously been used to estimate vesicle number.<sup>1</sup> The number of released ions can be determined as follows:

$$\# \text{ ions } (c) = (\text{release concentration})(\text{total volume})(\text{Avogadro's\#})$$

The following calculation is done for Ca<sup>2+</sup> release (760 μM). Here we assume a polymersome diameter of 120 nm and a membrane thickness of 10 nm.

$$n = \frac{\left(\frac{1.5 \text{ mmol}}{1000 \text{ mL}} \times \frac{0.3 \text{ mL}}{1} \times \frac{\text{mol}}{10^3 \text{ mmol}} \times \frac{6.022 \times 10^{23} \text{ chains}}{\text{mol}}\right) \left(\frac{\text{vesicle}}{4\pi(50^2 + 60^2) \text{ nm}^2}\right)}{\frac{1 \text{ chain}}{\text{nm}^2}}$$
$$c = \frac{760 \times 10^{-6} \text{ mol}}{1000 \text{ mL}} \times \frac{1 \text{ mL}}{1} \times \frac{6.022 \times 10^{23} \text{ ions}}{\text{mol}}$$
$$\frac{c}{n} = \frac{4.58 \times 10^{17} \text{ ions}}{3.54 \times 10^{12} \text{ vesicles}} = 130,000 \text{ ions/vesicle}$$

A similar calculation can be done for Zn<sup>2+</sup> release (35 μM), where  $c/n = 6,000$  ions/vesicle.

## Reference

- (1) Christian, N. A.; Milone, M. C.; Ranka, S. S.; Li, G.; Frail, P. R.; Davis, K. P.; Bates, F. S.; Therien, M. J.; Ghoroghchian, P. P.; June, C. H.; Hammer, D. A. Tat-functionalized near-infrared emissive polymersomes for dendritic cell labeling. *Bioconjugate Chem.* **2007**, *18*, 31-40.
